# Supplementary material for: Electrical conductivity fluctuations as a tracer to determine time-dependent transport characteristics in hyporheic sediments
Source: Copernicus journal article supplement (doi:10.5194/hess-2023-141), 2023-06-27
Supplement: Supplementary file [file hess-2023-141-AC1-supplement.pdf]

1 **hess-2023-141 - Response to Reviewer Comments**

2  
3 Electrical conductivity fluctuations as a tracer to determine time-dependent  
4 transport characteristics in hyporheic sediments

5 by: Jonas L. Schaper, Olaf A. Cirpka, Joerg Lewandowski, and Christiane Zarfl

6 Corresponding author: Jonas Schaper; *jonas.schaper@uni-tuebingen.de*, Department of Geosciences, Eberhard Karls  
7 University of Tübingen, Tübingen, Germany

8  
9 We thank all reviewers *and the editor* for their time spent on our manuscript and their constructive  
10 comments that considerably improved our manuscript.

11  
12 **General Remarks**

13 In the following, you find our replies to the reviewer comments on the manuscript “Electrical conductivity  
14 fluctuations as a tracer to determine time-dependent transport characteristics” submitted as a research article  
15 to HESS.

16 The main concerns of the reviewers were related to

- 17
- statements on the transport nature in hyporheic sediments (Fickian vs. non-Fickian),
  - 18 • the inclusion of an electric-conductivity (EC) offset term in the presented model,
  - 19 • the way we determined weighting factors by visual inspection of the L-curve, and
  - 20 • the general clarity and structure of the manuscript.

21 The main purpose of the manuscript is to discuss how the time series of a natural tracer, namely specific  
22 electric conductivity (EC), can be analyzed at shallow depths of hyporheic sediments. Hyporheic-exchange

23 flows are known to be highly dynamic so that the assumption of stationary (that is, time-independent) travel-  
24 time distributions is not valid, at least not for short travel distances over which the velocity fluctuations  
25 don't average out. We thus present a method to estimate non-stationary (that is, time dependent) travel-time  
26 distributions between rivers and fairly shallow points in hyporheic sediments from time series of EC. The  
27 main target is the mean travel time which we parameterize via a continuous time-function of advective  
28 porewater velocity for a fixed travel distance equaling the depth of the observation point within the sediment.  
29 We parameterize the spread of the travel-time distribution by assuming a constant dispersivity. Choosing  
30 the advection-dispersion equation with spatially constant and temporally varying coefficients as model is  
31 solely a choice of parameterization. This does not imply that we believe 1-D Fickian transport to be fully  
32 correct. We are convinced that estimating time-varying (!) coefficients of travel-time distributions from  
33 natural-tracer time series beyond metrics of their mean and spread is unrealistic. For the latter, the input  
34 signals of river EC are already too smooth. We will thus remove all statements on a potentially Fickian  
35 nature of transport from the manuscript, as they are distracting the readers from the main message.

36 There appeared to be some confusion of the reviewers caused by our comparison to results of non-parametric  
37 deconvolution. The latter approach assumes a stationary travel-time distribution, so that flux transients  
38 cannot be resolved. Travel-time distributions derived by deconvolution convert comparably narrow time-  
39 dependent travel-time distributions to stationary, broad or multi-modal distributions. We decided to keep  
40 this comparison to discuss effects of transient fluxes on deconvolution-derived stationary travel-time  
41 distributions, as the latter – established – approach has gained some popularity in the hyporheic-research  
42 community. The key message is that a stationary approach leads to artifacts resulting from transient flow.  
43 We are sorry that we were not able to convey this message clear enough in the original submission.

44 Similarly, the offset in EC needed in our model seemed to have confused this particular group of reviewers.  
45 EC can be continuously measured at low costs, which makes it a popular natural tracer in rivers and

46 hyporheic systems. But it is not perfectly conservative because some major ions that make up a substantial  
47 fraction of the EC signal (particularly calcium and bicarbonate) undergo precipitation/dissolution reactions  
48 that depend on temperature and small pH variations. This limitation of EC as natural tracer is well known,  
49 but it might have got lost in the introduction of the original manuscript. Anyway, when working with EC as  
50 natural tracer you have to deal with systematic offsets. Thus, the question is: how? In response to the  
51 reviewer comments, we performed a variety of additional model runs to investigate the effect of several  
52 types of trend models in the EC offset (constant, linear, one – and two knots per day used in spline  
53 interpolation), which we want to share in a revision of the manuscript. The key result is that reaction-related  
54 EC offsets between river water and pore water in the shallow hyporheic zone are unlikely to be constant in  
55 time.

56 Besides that, we intend to include a mathematical way of determining the optimal regularization weights,  
57 and improve the clarity and structure of the manuscript throughout. We trust that these improvements will  
58 help overcome concerns expressed by the reviewers and hope to get an opportunity to submit a revised  
59 version of the manuscript to HESS.

## 60 **Reviewer 1**

61 The study utilizes electrical conductivity (EC) as a natural tracer to evaluate water transport in the hyporheic  
62 zones of urban rivers in Germany and South Australia. By employing a time-dependent advection-dispersion  
63 equation (ADE) fitted to EC time series through Bayesian parameter inference, the research demonstrates  
64 that porewater velocities are highly variable, experiencing up to a six-fold increase within a 24-hour period.  
65 The study purports to validate the Fickian nature of transport in three out of four datasets, thereby affirming  
66 the applicability of ADE-based models. However, it recommends caution in interpreting Travel Time  
67 Distributions (TTDs) derived from EC, particularly when these distributions display tailings and multiple

68 secondary peaks. The work is well-suited for HESS, and both the modeling and dataset are relevant to the  
69 community.

70 **Reply:** We thank the reviewer for the summary and assessment of the manuscript.

71 **Comment 1**

72 The paper's primary issue lies in the lack of clarity in its presentation and the insufficient contextualization  
73 of the work. Regarding clarity, the derivation and presentation of the model are inadequate. Specifically, it  
74 is challenging to comprehend the rationale behind various aspects involving the time series data, such as:  
75 why are EC measurements offset only once a day? Why choose 1-8 velocity values per day instead of a  
76 continuous velocity change? How are the weight values determined? Is it merely by visually inspecting the  
77 ratio from the L curves? What constitutes a hypothetical flow line? Additional examples will be presented  
78 later. Furthermore, the frequent references to figures and tables in the supplementary material necessitate  
79 constant toggling between the supplementary material and the main paper, suggesting that these should be  
80 integrated into the main paper.

81 **Reply:** We will restructure the paper to improve both its clarity and the contextualization of its content.

82 Maybe it did not become clear enough in the original submission, but the velocity change in our  
83 model is indeed continuous. It is based on a smooth interpolation between knots whose values are  
84 estimated; the differences between the values at the knots are further regularized by a smoothness  
85 constraint (first-order Tikhonov regularization). The appropriate temporal resolution of these knots  
86 is one of the issues addressed in our study: If you choose a high resolution in conjunction with little  
87 smoothing by regularization, you simply map noise in the two time-series onto each other.  
88 Conversely, if you choose a low resolution or imply very strict smoothing, you miss the information  
89 on transient flow contained in the data. The appropriate resolution and smoothing are case dependent

90 because input signals at different streams or at different times have different power spectra. We  
91 want to show how to approach the question of the right resolution.

92 In the revised version, we will discuss the effects of different temporal resolutions of knots for the  
93 interpolation of the EC offset, including a linear trend model. We will demonstrate that even when  
94 the EC offset is assumed constant, large temporal fluctuations of mean travel time (expressed by  
95 fluctuations of porewater velocities) can be estimated from the presented EC time series.  
96 Furthermore, we will use the maximum curvature of the L-curve as defined in Hansen (1999) as  
97 criterion to define the optimal value of the smoothing weights.

98

99 **Comment 2:**

100 In terms of context, the authors seem to overlook a substantial body of literature on anomalous transport in  
101 the hyporheic zone. This omission is surprising, especially considering that one dataset in their study is non-  
102 Fickian. Moreover, the complex processes involved in setting daily velocity values, and extracting  
103 weighting times from a hypothetical flow line could potentially result in overfitting the data to appear as  
104 Fickian flow. Therefore, I recommend exploring and acknowledging other non-Fickian possibilities and  
105 referring to the extensive non-Fickian literature in the hyporheic zone. A few select references are provided,  
106 but there are many more:

107 Singha, Kamini, et al. "Electrical characterization of non-Fickian transport in groundwater and hyporheic  
108 systems." *Water Resources Research* 44.4 (2008).

109 Boano, Fulvio, et al. "A continuous time random walk approach to the stream transport of solutes." *Water  
110 Resources Research* 43.10 (2007).

111 Roche, Kevin R., et al. "Effects of turbulent hyporheic mixing on reach-scale transport." *Water Resources  
112 Research* 55.5 (2019): 3780-3795.

113 Berkowitz, Brian, and Erwin Zehe. "Surface water and groundwater: unifying conceptualization and  
114 quantification of the two "water worlds"." *Hydrology and Earth System Sciences* 24.4 (2020): 1831-1858.  
115 Drummond, J. D., et al. "Effects of solute breakthrough curve tail truncation on residence time estimates: A  
116 synthesis of solute tracer injection studies." *Journal of Geophysical Research: Biogeosciences* 117.G3  
117 (2012).  
118 Sherman, Thomas, et al. "A dual domain stochastic lagrangian model for predicting transport in open  
119 channels with hyporheic exchange." *Advances in water resources* 125 (2019): 57-67.  
120 Haggerty, R., Wondzell, S. M., and Johnson, M. A.: Power-law residence time distribution in the hyporheic  
121 zone of a 2nd-order mountain stream, *Geophys. Res. Lett.*, 29, 18-1–18-4, (2002).

122 **Reply:** We are grateful to the reviewer to point out the missing literature and included those articles  
123 suggested by the reviewer that deal with travel times between surface-water bodies to individual  
124 points in groundwater/hyporheic sediments. Some of the references listed by the reviewer, however,  
125 deal with travel-time distributions from the river through the hyporheic zone back to the river as  
126 needed in reach-scale transport models. These distributions summarize the effects of transport along  
127 a wide distribution of path lengths and velocities, which is not comparable to a travel-time  
128 distribution from a stream to a single point within its sediment. (This is like confusing groundwater  
129 travel times to a point and those observed in a pumping well, where the latter is an integral and  
130 shows substantial tailing caused by geometric effects.)

131 We agree that assuming Fickian transport is debatable in many applications. However, the aim of  
132 our study and the presented model is to estimate the time-variability of (mean) travel times from  
133 natural EC fluctuations, where we are restricted to what can be extracted from the data. Most tools  
134 to fit nonlocal transport models (CTRW, fADE, dual-domain transport, MRMT, ...) assume time-  
135 stationarity of the transport coefficients, resulting in stationary travel-time distributions. Extending

136 such tools to account for time-dependent parameters would require data that allow extracting higher-  
137 order features of travel-time distributions by some kind of deconvolution (e.g., regular Dirac pulses  
138 in the inflow would allow to study tailing). We doubt that our natural EC data (or the natural EC  
139 data of any other river that we are aware of) are suitable to inform nonlocal transport models with  
140 dynamic coefficients. In particular, the EC time series collected as part of our study show distinct  
141 diurnal fluctuations, so that they don't allow estimates of long-time (>24 h) transport behavior in a  
142 way as time series collected after the traditional pulse injection of an artificial tracer (with the latter  
143 having the disadvantage of representing only the conditions at the time of the artificial-tracer  
144 experiment).

145 In summary: Is the transport between the rivers and observation points analyzed in our study  
146 Fickian? We don't know. But we doubt that the natural-tracer time series contain the information  
147 needed to answer this question. We simply stick to the simplest model that can explain the existing  
148 data – according to the modeling rule “as simple as possible, as complex as necessary”.

149

## 150 **Detailed Comments**

151 **Comment 3:** Line 143: The sentences, "Thus, we use equation 1 only as a parameterization to obtain time-  
152 dependent transfer functions, and we consider the coefficients determined upon calibration as apparent ones.  
153 In particular, the time variable velocity may in reality reflect effects of both changes in the true porewater  
154 velocities and shifts in travel paths," are unclear. If the ADE is merely used to parameterize the coefficients,  
155 how can the study claim the flow is Fickian? This appears tautological. Clarification is needed on why this  
156 procedure and the associated ADE are superior to other methods.

157 **Reply:** We are sorry for the confusion. The problem does not so much lie in the cited sentence, but in other  
158 – misleading – statements elsewhere. We will rewrite the introduction of the model and emphasize

159 even more that the ADE is used exclusively as a parameterization tool to obtain time dependent  
160 travel-time distributions from a stream to a single observation point in the sediment, where the  
161 travel-time distributions are defined by a few time-dependent coefficients. As noted above, the ADE  
162 is used because of its simplicity and because long-time transport behavior ( $> 24$  h) cannot be  
163 extracted from diurnal EC fluctuations so that long tails in travel-time distributions that would  
164 require nonlocal transport models cannot be extracted from the data.

165  
166 **Comment 4:** Furthermore, the authors repeatedly mention throughout the manuscript that travel paths may  
167 shift, but they do not elucidate the mechanism responsible for these changes in flow paths. This is crucial,  
168 as understanding the mechanism could constrain the variations in flow paths in alignment with the proposed  
169 model.

170 **Reply:** In the revised manuscript, we will discuss mechanisms that may cause spatial shifts of flow paths  
171 from the surface water to hyporheic sediments in the discussion section. Particularly, the topmost  
172 layer of streambed sediments (i.e., the first cm) is highly dynamic due to sedimentation and erosion  
173 processes changing the geometry of the boundary and the hydraulic properties in the topmost layer.  
174 These changes cause changes in the spatial arrangements of flow paths. However, to decipher the  
175 exact magnitude and cause of shifts in a specific case would require a detailed 4-D analysis of flow  
176 and sediment transport, which is beyond the capability of standard experiments in the hyporheic  
177 zone. Thus, the remaining statement is: The standard conceptual model of hyporheic flow paths  
178 being fixed tubes is debatable, you will see effects of shifts (the exact nature of which will remain  
179 hidden ) on solute transport if you observe over a sufficiently long period of time, whereas you may  
180 miss it altogether in a single artificial-tracer experiment with pulse injection. Such shifts would have



181 of course implications for reactive-transport models that assume spatially variable reactive  
182 properties of the sediment matrix, but these aspects are beyond the scope of the current study.

183  
184 **Comment 5:** Line 152: What is the rationale for having only one EC offset per day? Given the data for the  
185 stream stage, there could be two offsets per day or a common trend line. An explanation for this choice is  
186 needed.

187 **Reply:** We have explored the effects of two knots per day in the interpolation of the EC offset, a constant  
188 offset, and a linear trend, and want to include the results in the revised version of the manuscript. In  
189 all cases, the fitted porewater velocities show similar temporal variability.

190 Of course, if you allow high-frequency EC offsets (many knots, no smoothing), you can “blame”  
191 all differences in EC time series between the input (river) and output (point in the sediment) to  
192 offsets that are independent of transport. Thus, the goal should be to allow as little transient behavior  
193 in the EC offset while still fitting the data.

194  
195 **Comment 6:** Line 155: Similarly, why decide on 1, 2, 4, and 8 velocity values per day? Is there a marker in  
196 the data that suggests this? Are there known changes in the head value that necessitate this range of change?

197 **Reply:** In all datasets reported in the present study, stream stages show diurnal fluctuations, a finding that  
198 motivated the use of more than one knot per day in the temporal interpolation of velocity. As in  
199 most regularization problems the choice of the knot resolution is arbitrary and needs to be chosen  
200 by the modeler. With increasing number of knots, computational efforts involved in parameter  
201 estimation via DREAM increase dramatically. While the goodness of fit initially increases with the  
202 number of knots, it may reach a plateau value where additional knots will cease to have positive

203 effects on the goodness of fit. In the revised version of the manuscript we improve the discussion  
204 on the number of knots in the velocity interpolation.

205  
206 **Comment 7:** Line 159: It is assumed that bold font indicates a vector for all variables, yet this is not  
207 explicitly stated in the text.

208 **Reply:** We will clarify this in the revised version.

209  
210 **Comment 8:** Line 166: The sentence, "subject to a constant that does not depend on the parameters," is  
211 unclear. What does this mean in the context of the study?

212 **Reply:** The constant comes from taking the logarithm of the Gaussian likelihood function. The scaling  
213 factor in front of the exponential in the Gaussian function depends on the assumed measurement  
214 error, but not on the magnitude of the residual, and neither on the fitted parameters. When taking  
215 the logarithm, this factor becomes a constant that is not altered by modifying the parameters. We  
216 will clarify this in the revised version of the manuscript.

217  
218 **Comment 9:** Paragraph 174-181: While the method of finding weights through L-curves is described, the  
219 reason for doing so is not clear. What purpose does the weighting serve? Is it only to establish how well the  
220 model captures the measurements? If so, why is it just "an additional measure of the goodness of fit"?

221 **Reply:** In the intended revision, we will extend the above-mentioned paragraph to explain the purpose of  
222 the weights and the L-curve method in more detail. In brief, the purpose of the present study and its  
223 novelty primarily lie in determining a continuous function of (apparent) flow velocities over time  
224  $v(t)$ . To avoid overfitting and to determine the optimal number of knots needed to construct a  
225 continuous velocity function, regularization is needed, i.e., large "jumps" in consecutive velocity

226 knots are penalized to gain a relatively smooth continuous function of velocity (and EC offset)  
227 values. Too much smoothing, however, will lead to a decrease in the goodness of fit if the true  
228 velocity function exhibits strong temporal variations. The purpose of the weights is to navigate  
229 between meeting the measured EC values in the sediment as well as possible versus allowing as  
230 little variations in the fitted coefficients. The approach is common in classical geophysical inversion  
231 and can be interpreted as a multi-Gaussian prior of the fitted parameters with linear covariance  
232 function if wanted (Kitanidis, 1992, The minimum structure solution to the inverse problem, *Water*  
233 *Resour. Res.*, 33(10): 2263-2272). In essence, a metric of the smoothness is added to the sum of  
234 squared residuals in equation 4 (see for instance: Hansen 1999: The L-curve and its use in the  
235 numerical treatment of inverse problems).

236

237 **Comment 10:** Line 184: How is the hypothetical flow line established? Given that velocity seems to be  
238 unknown due to the unknown path, how many possibilities are there?

239 **Reply:** Given that the only knowns are that the trajectory starts somewhere at the river-riverbed interface  
240 and ends at the observation point, the number of potential trajectories is infinite. In the simplified  
241 case that vertical velocity is spatially uniform and that the riverbed surface is flat, the horizontal  
242 flow component would be irrelevant to establish a relationship between depth and travel time. As  
243 we will clarify in the revision, the assumed flow line serves the sole purpose of providing a  
244 parameterization for the travel-time distribution. For this purpose we assume the simplest case, that  
245 is, a straight, vertical flow line from the surface water to the measurement point in the streambed  
246 sediment, which we will explicitly mention. Because the exact trajectory and the hydraulic  
247 properties along it are unknown, the estimated velocity is an apparent parameter.

248

249 **Comment 11:** Line 201: The paper is laden with specialized jargon that, in my opinion, detracts from its  
250 accessibility. For instance, the term "homoscedastic epistemic model error" could be simplified.  
251 "Homoscedastic" could be replaced with "homogeneity of variances," and "epistemic" could be substituted  
252 with "model uncertainty," resulting in the phrase "variance homogeneity uncertainty due to measurement  
253 errors." My potential misinterpretation of these terms underscores the need for clearer explanations rather  
254 than reliance on specialized jargon, especially given the broad readership of HESS. I recommend clarifying  
255 the terminology to make the paper more accessible to a wider audience.

256 **Reply:** We agree and will replace/omit specialized jargon in the revised version.

257  
258 **Comment 12:** Line 266-270: The authors transparently enumerate all potential processes that could  
259 influence the EC measurements and introduce errors, which is commendable. However, they do not specify  
260 how they address these issues. Is this accounted for in the "homoscedastic epistemic model error"? Is there  
261 a methodology to estimate the impact of each process relative to the measurement? In line 279, they state  
262 that all these ranges of uncertainty should be considered as model uncertainties. Yet, there are distinct  
263 approaches to handling model uncertainties (via ensemble methods) and measurement uncertainties (by  
264 calculating the potential range of influence). While the authors do acknowledge this by discussing the  
265 correlation between coefficients, they conclude by stating, "It is thus likely that the temporal dynamics of  
266 EC offset are predominantly related to measurement error." If so, why substitute one form of uncertainty  
267 for another when they stem from different sources? This is particularly perplexing given that changes in  
268 flow paths are consistently cited as the reason for broad peaks in travel-time distribution and other  
269 discrepancies, yet this form of uncertainty is not addressed in the study.

270 **Reply:** We are not sure which approaches to handling model uncertainties the reviewer is referring to. The  
271 ensemble methods that we know of would imply a set of different conceptual models leading to

272 different mathematical descriptions forming an ensemble, which then is analyzed for instance by  
273 Bayesian model comparison. That of course requires that the different models are explicitly  
274 formulated (e.g., defining models in which the pathlengths of trajectories vary over time, or in which  
275 the hydrogeochemistry of solutes and relevant minerals are explicitly calculated to understand the  
276 offsets). To really decipher where discrepancies stem from, much more data would be needed (for  
277 instance time series of individual ion concentrations; for shifting flow paths we even don't know  
278 what kind of detailed information would be attainable), which neither we nor the majority of other  
279 researchers working with EC time series have. We consider it pointless to setting up more complex  
280 models without the corresponding data to inform them. At the end, we want to provide a manageable  
281 way to interpret data that are easy to obtain in riverbed sediments. But we cannot provide a fully  
282 mechanistic explanation of all errors and uncertainties occurring. This is a pretty common situation  
283 in environmental monitoring, and it is also common that residuals are an undecipherable mixture of  
284 measurement and model errors.

285  
286 **Comment 13:** Figure 2: Why is there a discrepancy between the "measured" velocity peak and the mean  
287 advective travel time peak? It appears that the maximal residence peaks are misaligned with the  
288 corresponding porewater velocity, which is perplexing since one is a consequence of the other.

289 **Reply:** The difference between the estimated continuous velocity function and the residence time function  
290 arise from our definition and calculation of the mean advective travel time as the time period, where  
291 the integral of the past velocity function equals the travel path distance. Thus, there is a time lag  
292 between the travel time function and the porewater velocity function. The travel time is always the  
293 integral of the inverse velocity over the travel path.

294

295 **Comment 14:** Figure SI-1: Should there be a variation in the dimensions of the regularization weights for  
296 porewater velocity ( $\lambda$ ), and the EC offset dimension, ( $\lambda$ )?

297 **Reply:** Yes, there should be. The dimensions of the weights are mentioned in the figure caption.

298  
299 **Comment 15:** The term "Stream stage" is frequently mentioned but not defined. This is a recurring issue in  
300 the paper and is often the result of using specialized jargon in papers aimed at a specific audience. Please  
301 define all terms and refrain from using specialized terminology where possible.

302 **Reply:** We will define the term stream stage in the revised version of the manuscript. It is the water table  
303 of the stream (typically measured in meters above sealevel).

304

## 305 **Reviewer 2**

306 This MS concerns the inverse problem of inference of point-to-point transfer functions for short travel  
307 distances beneath streambeds. Although some calibrated hyporheic flow time series are presented and a few  
308 remarks made concerning the nature of the transport uncovered, this is not the focus of the paper. This is  
309 presented as a paper introducing a new calibration method, and I am considering it primarily on that basis.

### 310 **Comment 1**

311 I found the presentation confusing and it difficult to determine just what was being proposed, based the  
312 information provided in the manuscript. This is obviously a major problem in a document aiming to outline  
313 a new method. In particular, it is not at all clear what the relationship is between Equations (4) and (8).  
314 Many times, reference is made to use of the non-parametric deconvolution algorithm of Cirpka (2007), and  
315 (8) is naturally applicable without specifying a functional form of  $g()$ . But elsewhere there is reference to  
316 whether transport is or is not Fickian, and to the underlying dispersivity and velocity, as shown in (1). This

317 of course implies a parametric calibration. The two formulations differ in their interpretation of the primary  
318 source of mismatch (measurement vs. model error), and in what time series' quadratic variations they  
319 penalize (latent variables vs. outcome). Surprisingly to me, the non-parametric (8) appears to be used in a  
320 context where the realism and physical interpretation of the underlying parameters are of interest: where the  
321 Fickian or non-Fickian nature of the transfer functions is concerned. It seems like it would be ideal to  
322 identify the best-fit Fickian transfer function via (4) and compare it with the empirical result.

323 **Reply:** The purpose of the present study is to determine time-dependent transport characteristics from EC  
324 time series. We do this via the parameterization provided in equations 1 & 2, leading to the objective  
325 function of equation 4. We will make this clearer in the revision.

326 The non-parametric deconvolution (equation 8) is only included for comparison purposes. It is an  
327 established technique with the advantage that it does not prescribe the shape of the travel-time  
328 distribution, but also with the strong limitation that it relies on stationarity, that is, transport  
329 characteristics are assumed to remain identical over time. We want to keep this comparison in order  
330 to show that uncommon features in stationary travel-time distributions (such as multiple peaks) can  
331 be the result of neglecting the transient flow-and-transport characteristics.

332 We will remove statements on the transport nature in hyporheic sediments throughout the revised  
333 version of the manuscript as this was distracting the reviewers from the main message.

334

### 335 **Comment 2**

336 I am also concerned about the introduction of the physically unmotivated "offset"  $o(t)$  that fudges the  
337 difference between the EC predicted by the transient ADE and the observed EC, and which is allowed to  
338 change every day. It is not clear why this function is needed at all. It is possible to simply find the best-  
339 fitting calibrated model against a time series by a least squares plus penalty functional procedure similar to

340 the ones shown in the paper. It appears  $o(t)$  might have been introduced so that part of the mismatch can be  
341 categorized as measurement error in (4). I generally expect model error to dwarf measurement error in these  
342 sorts of applications, and in any event, a coarse temporal resolution of  $o(t)$  is considered, so the first term  
343 of (4) inherently contains some model error. And furthermore, the two regularization terms in (4) do not  
344 have a probabilistic foundation: they are determined from the L-curve approach, which is rooted in the idea  
345 of minimum MSE. It seems like the complexity of  $o(t)$  can be dispensed with from the point of view of  
346 parameter identification.

347 I believe the authors should demonstrate the superiority of the calibration approach in (4) relative to a  
348 straightforward approach that does not include the offset and/or time-varying velocity by computing AICc.  
349 Furthermore, it is not clearly shown how well the model (1) fits the data, and how much work  $o(t)$  is doing  
350 to fudge the difference between model prediction and observed data, and how much it is being allowed to  
351 vary, ad hoc, from day to day. This should be shown.

352 **Reply:** There are good chemical reasons for the EC offset, which has been observed at practically all  
353 riverbank-filtration sites. EC results from the concentrations of dissolved ions. If the only ions were  
354  $\text{Na}^+$  and  $\text{Cl}^-$ , EC would be a conservative tracer. However, a substantial fraction of EC is caused by  
355  $\text{Ca}^{2+}$  and bicarbonate ( $\text{HCO}_3^-$ ) and, to a minor extent, other ions that undergo  
356 precipitation/dissolution reactions. It is normal that river-borne water parcels increase in  
357 mineralization while being transported through sediments. The factors influencing the increase in  
358 EC include the partial pressure of  $\text{CO}_2$ , temperature, and microbial activity, which vary over time.  
359 On top of these chemical reasons the data loggers recording EC time series are known to drift over  
360 time. That is, EC is not an ideal tracer. But it is easy to measure and therefore readily available at  
361 many sites. When analyzing EC time series, one cannot neglect offsets. The only question is how  
362 to deal with it.



363 We agree that the inclusion of the EC-offset term warrants a more thorough investigation on its  
364 effect on the estimated velocity values (representing mean travel time) and the goodness of the fit.  
365 In the revised version of the manuscript we will i) use AIC to compare model runs based on both  
366 their likelihood and the number of involved parameters and ii) thoroughly discuss the effects of the  
367 EC offset by including model runs that a) have no EC offset, b) have a constant EC offset, c) include  
368 a linear EC offset trend model and d) have two and one knots per day in the interpolation of the EC  
369 offset. The temporal variations of the inferred apparent velocities are very similar in all model runs.  
370 The smoothing regularization term is a standard method used in geophysical inversion. As it has the  
371 functional form of a sum of squares it can easily interpreted as the logarithm of a Gaussian prior.  
372 Specifically, the 1-D smoothness constraint is mathematically identical to a linear generalized  
373 covariance function for a multi-Gaussian prior distribution of the parameters (Kitanidis, 1992).  
374 While there are Bayesian techniques to obtain the weights (with poor convergence behavior), we  
375 suggest following methods that are well established in geophysical inversion based on the curvature  
376 of the L-curve (Hansen, 1999) and will apply these techniques more rigorously.

377

378 **Comment 3**

379 Figure 3b appears to show a comparison of measured and simulated time series, but there is a very obvious  
380 delay visible between the two time series. Why did this not result in a differently identified velocity?

381 **Reply:** There is almost no difference between the modelled and measured EC time series in the hyporheic  
382 zone and thus the line (simulated) and measured (points) values closely overlay. As shown in the  
383 legend, the grey dots represent measurements of EC in the surface water of the respective streams,  
384 and the delay is actually the signal that we are after.

385

386 **Comment 4**

387 Statements about the seemingly Fickian / non-Fickian nature of the travel time distributions seem to be  
388 based on eyeballing the non-parametric distributions shown in Figure 4. In my view, there is not enough  
389 evidence given to support these statements.

390 **Reply:** We agree and will remove statements on the nature of porewater transport in the revised version of  
391 the manuscript. We plan to keep Figure 4 to discuss effects caused by the violation of the assumption  
392 of steady-state flow inherent in the applied non-parametric deconvolution method.

393

394 **Comment 5**

395 Finally, it would be helpful for the authors to highlight the novelty in the presented results. The model-free  
396 deconvolution approach is previously published, and other major aspects---Bayesian framing, quadratic  
397 penalty functional, use of L-curve to trade off bias and variance---are all well established in the literature.  
398 Is the particular way they are combined original? (Again, this is hard to evaluate because of the confusing  
399 presentation.) Or is it the use of these classic techniques in the context of hyperheic flow that is new?  
400 Whatever the claim to originality, it should be made clear and contextualized relative to existing literature.

401 **Reply:** The novelty of the present manuscript lies in the combination of the above-mentioned methods (L-  
402 curve regularization, Bayesian framework) to determine the transient behavior of apparent velocities  
403 (and thus mean travel time) in hyperheic sediments. The previously established method of non-  
404 parametric deconvolution, which assumes stationarity, primarily serves as a reference and is  
405 included to highlight the effects of a violation of the stationary flux assumption in non-parametric  
406 deconvolution. We will highlight the novelty and the main goal of the present study more clearly in  
407 the revised version of the manuscript.

408

409 **Reviewer 3**

410 **Comment 1:** As the earlier reviewers state, the article concerns an interesting and relevant topic but is full  
411 with what seem to be arbitrary choices and ad hoc solutions. Something like the time-varying EC off-set,  
412  $o(t)$ , is such an artefact. No serious physical explanation is provided. To keep things from pure noise-fitting,  
413 a regularization is applied but the choice of the weights is based on visual inspection, which is difficult to  
414 replicate.

415 **Reply:** As listed above, the chemical nature of the EC offset is pretty clear, and we may have missed to  
416 explain it in the original submission because we thought that everybody in the hyporheic-zone  
417 community knows about it. We will add that information. We have already performed the  
418 calculations for a mathematically tractable approach of obtaining the optimal set of weighting  
419 factors (see Reviewer I, comment 1) and investigated the effects of the time-varying EC off-set,  
420  $o(t)$ , in more detail (i.e., use a constant offset value, a linear trend model and two knots per day in  
421 the interpolation of the EC offset). We can show that these are neither arbitrary choices nor ad-hoc  
422 solutions.

423  
424 **Comment 2:** The reason to accept a Fickian model seems to be necessary but not sufficient. What would  
425 be the results if non-Fickian models were applied throughout?

426 **Reply:** Our primary emphasis is on the temporal variation of apparent velocity (which primarily determines  
427 the mean travel time). We need a metric of spread in the travel-time distribution, for which we  
428 choose a constant dispersivity. These are parametric choices to keep the inverse problem  
429 manageable. A non-Fickian approach with time-dependent coefficients would imply estimating  
430 more parameters, which are poorly constrained by the data. The latter is caused by the type of input  
431 data: comparably smooth, mainly diurnal variations of EC in the river water, that lack both high

432 frequencies (which you would have in artificial-tracer tests with pulse injection) and distinct  
433 information on time scales > 24 h.

434 As mentioned above, the comparison of our results with the results obtained by non-parametric  
435 deconvolution primarily serve the purpose of investigating the effect of transient flow on  
436 deconvolution approaches that assume stationarity. We plan on clarifying these issues in the revised  
437 version of the manuscript.

438  
439 **Comment 3:** Why is maximum likelihood used for  $\sigma_{ep}$  and expectation maximization for Theta? And  
440 so forth.

441 **Reply:** Maximum likelihood is used in the model developed and discussed as part of the present manuscript,  
442 because the approach is readily reconciled with the Bayesian approach used to determine posterior  
443 parameter probability distributions. Expectation maximization (EM) is part of the previously  
444 published approach of non-parametric deconvolution (Cirpka et al., 2007 Groundwater).  
445 Specifically, EM is used to obtain the “measurement” error  $\sigma_{ep}$ . Interested readers are referred to the  
446 original paper on that method, which is used only for comparison.

447  
448 **Comment 4:** It would probably be difficult to go through everything in such detail that the reader becomes  
449 convinced of the reasonableness of it all, also because a lot has been covered in an earlier article by Cirpka.  
450 A possible way forward is to accompany the article by something like a Python Notebook with annotated  
451 code and prepped data sets. That would allow readers to get a better idea about the visual inspection of the  
452 steepness of the L-curve, etc. Presently, the code is available on request, which is a good step but it could  
453 be better and the impact of the article would be much stronger.

454 **Reply:** We are grateful for the suggestion and will publish the python scripts alongside with the data of the  
455 present manuscript with the revised version.
